# Supplementary material for: A Survey of Quality Assurance Practices in Biomedical Open Source Software Projects
Source: PubMed Central journal article supplement (PMC1874720; doi:10.2196/jmir.9.2.e8), 2007-05-07
Supplement: jmir_v9i2e8_app2.pdf [file jmir_v9i2e8_app2.pdf]

## Multimedia Appendix 2. List of OS Projects Contacted for Survey

| Project Name                             | Web Page                                                                                                            |
|------------------------------------------|---------------------------------------------------------------------------------------------------------------------|
| 3D Slicer                                | <a href="http://www.slicer.org/">http://www.slicer.org/</a>                                                         |
| Apollo                                   | <a href="http://www.fruitfly.org/annot/apollo/">http://www.fruitfly.org/annot/apollo/</a>                           |
| Biobuilder                               | <a href="http://www.biomedcentral.com/1471-2105/5/43">http://www.biomedcentral.com/1471-2105/5/43</a>               |
| Bioconductor                             | <a href="http://www.bioconductor.org">http://www.bioconductor.org</a>                                               |
| Biojava                                  | <a href="http://www.biojava.org/">http://www.biojava.org/</a>                                                       |
| Biomail Scientific References Automation | <a href="http://biomail.sourceforge.net/biomail/index.html">http://biomail.sourceforge.net/biomail/index.html</a>   |
| Bioperl                                  | <a href="http://bioperl.org/">http://bioperl.org/</a>                                                               |
| Biophp                                   | <a href="http://biophp.org">http://biophp.org</a>                                                                   |
| Biopython                                | <a href="http://www.biopython.org/">http://www.biopython.org/</a>                                                   |
| Bioquery                                 | <a href="http://www.bioquery.org/">http://www.bioquery.org/</a>                                                     |
| Biowarehouse                             | <a href="http://bioinformatics.ai.sri.com/biowarehouse/">http://bioinformatics.ai.sri.com/biowarehouse/</a>         |
| Cd-Hit Sequence Clustering Software      | <a href="http://bioinformatics.org/cd-hit/">http://bioinformatics.org/cd-hit/</a>                                   |
| Chemistry Development Kit                | <a href="http://almost.cubic.uni-koeln.de/cdk/">http://almost.cubic.uni-koeln.de/cdk/</a>                           |
| Coasim                                   | <a href="http://www.daimi.au.dk/~mailund/CoaSim/">http://www.daimi.au.dk/~mailund/CoaSim/</a>                       |
| Cytoscape                                | <a href="http://www.cytoscape.org">http://www.cytoscape.org</a>                                                     |
| Das                                      | <a href="http://biodas.org/">http://biodas.org/</a>                                                                 |
| E-Cell System                            | <a href="http://sourceforge.net/projects/ecell/">http://sourceforge.net/projects/ecell/</a>                         |
| Emboss                                   | <a href="http://emboss.sourceforge.net/">http://emboss.sourceforge.net/</a>                                         |
| Ensemble                                 | <a href="http://www.ensembl.org/info/software/versions.html">http://www.ensembl.org/info/software/versions.html</a> |
| Eviewbox Dicom Java Project              | <a href="http://sourceforge.net/projects/eviewbox/">http://sourceforge.net/projects/eviewbox/</a>                   |
| Freemed Project                          | <a href="http://bioinformatics.org/project/?group_id=298">http://bioinformatics.org/project/?group_id=298</a>       |
| Gchemical                                | <a href="http://www.bioinformatics.org/gchemical/">http://www.bioinformatics.org/gchemical/</a>                     |
| Gnumed                                   | <a href="http://www.gnumed.org">http://www.gnumed.org</a>                                                           |
| Medical Dataserver                       | <a href="http://www.mii.ucla.edu/dataserver">http://www.mii.ucla.edu/dataserver</a>                                 |
| Medical Image Analysis                   | <a href="http://sourceforge.net/projects/mia">http://sourceforge.net/projects/mia</a>                               |
| Moby                                     | <a href="http://biomoby.open-bio.org/">http://biomoby.open-bio.org/</a>                                             |
| Olduvai                                  | <a href="http://sourceforge.net/projects/olduvai/">http://sourceforge.net/projects/olduvai/</a>                     |
| Openclinica                              | <a href="http://www.openclinica.org">http://www.openclinica.org</a>                                                 |
| Openemed                                 | <a href="http://openemed.org/">http://openemed.org/</a>                                                             |
| Openemr                                  | <a href="http://www.oemr.org/">http://www.oemr.org/</a>                                                             |
| Oscarmcmaster                            | <a href="http://sourceforge.net/projects/oscarcmcmaster/">http://sourceforge.net/projects/oscarcmcmaster/</a>       |
| Probemaker                               | <a href="http://probemaker.sourceforge.net/">http://probemaker.sourceforge.net/</a>                                 |
| Res Medicinae                            | <a href="http://resmedicinae.sourceforge.net/">http://resmedicinae.sourceforge.net/</a>                             |
| Rtools                                   | <a href="http://www.bioconductor.org">http://www.bioconductor.org</a>                                               |
| S2s                                      | <a href="http://bioinformatics.org/S2S/">http://bioinformatics.org/S2S/</a>                                         |
| Sashimi                                  | <a href="http://sourceforge.net/projects/sashimi/">http://sourceforge.net/projects/sashimi/</a>                     |
| Sbeams                                   | <a href="http://www.sbeams.org">http://www.sbeams.org</a>                                                           |
| Alkahest                                 | <a href="http://www.alkahest.org">http://www.alkahest.org</a>                                                       |

|                                                                                              |                                                                                                                                                                               |
|----------------------------------------------------------------------------------------------|-------------------------------------------------------------------------------------------------------------------------------------------------------------------------------|
| Array-A-Lizer                                                                                | <a href="http://bioinformatics.org/cgi-bin/cvsweb.cgi/arrayalizer/">http://bioinformatics.org/cgi-bin/cvsweb.cgi/arrayalizer/</a>                                             |
| Ball                                                                                         | <a href="http://bioinformatics.org/project/?group_id=506">http://bioinformatics.org/project/?group_id=506</a>                                                                 |
| Biococoa Biolibrary For Obj-C                                                                | <a href="http://bioinformatics.org/project/?group_id=318">http://bioinformatics.org/project/?group_id=318</a>                                                                 |
| Biomedical Informatics Research Network                                                      | <a href="http://www.nbirn.net">http://www.nbirn.net</a>                                                                                                                       |
| Biosignal Tools                                                                              | <a href="http://sourceforge.net/projects/biosig">http://sourceforge.net/projects/biosig</a>                                                                                   |
| Brain Imaging Simulation System                                                              | <a href="http://sourceforge.net/projects/brainimage">http://sourceforge.net/projects/brainimage</a>                                                                           |
| Cehr Net                                                                                     | <a href="http://sourceforge.net/projects/cehrnet/">http://sourceforge.net/projects/cehrnet/</a>                                                                               |
| Clearhealth Practice Management System                                                       | <a href="http://sourceforge.net/projects/clearhealth/">http://sourceforge.net/projects/clearhealth/</a>                                                                       |
| Common Open Source Medical Objects                                                           | <a href="http://sourceforge.net/projects/cosmos">http://sourceforge.net/projects/cosmos</a>                                                                                   |
| Compbio Perl Module Suite                                                                    | <a href="http://sourceforge.net/projects/compbio/">http://sourceforge.net/projects/compbio/</a>                                                                               |
| Delila-Genome Protein Binding Analysis                                                       | <a href="http://bioinformatics.org/project/?group_id=296">http://bioinformatics.org/project/?group_id=296</a>                                                                 |
| Deltastat 2D Gel Analysis                                                                    | <a href="http://bioinformatics.org/project/?group_id=371">http://bioinformatics.org/project/?group_id=371</a>                                                                 |
| Dicom.Pm                                                                                     | <a href="http://dicomperl.sourceforge.net/">http://dicomperl.sourceforge.net/</a>                                                                                             |
| Dicomparser                                                                                  | <a href="http://sourceforge.net/projects/dicomparser/">http://sourceforge.net/projects/dicomparser/</a>                                                                       |
| Disease Gene Profiler                                                                        | <a href="http://sourceforge.net/projects/dgp/">http://sourceforge.net/projects/dgp/</a>                                                                                       |
| Eidors 3D                                                                                    | <a href="http://sourceforge.net/projects/eidors3d/">http://sourceforge.net/projects/eidors3d/</a>                                                                             |
| Extractor For Esi Quadrupole ToF Tandem Ms Data Enabled For High Throughput Batch Processing | <a href="http://sourceforge.net/projects/protms/">http://sourceforge.net/projects/protms/</a>                                                                                 |
| Febrl                                                                                        | <a href="http://sourceforge.net/projects/febrl">http://sourceforge.net/projects/febrl</a>                                                                                     |
| Free Practice Management                                                                     | <a href="http://sourceforge.net/projects/freepm/">http://sourceforge.net/projects/freepm/</a>                                                                                 |
| Free2bind                                                                                    | <a href="http://sourceforge.net/projects/free2bind/">http://sourceforge.net/projects/free2bind/</a>                                                                           |
| Fs Kit Analysis Of Force Spectra                                                             | <a href="http://galaxie.cgb.ki.se/galaxieEST.html">http://galaxie.cgb.ki.se/galaxieEST.html</a>                                                                               |
| Gata                                                                                         | <a href="http://sourceforge.net/projects/geckoe">http://sourceforge.net/projects/geckoe</a>                                                                                   |
| Gecko                                                                                        | <a href="http://www.cebitec.uni-bielefeld.de/groups/brf/software/gendb_info/license.html">http://www.cebitec.uni-bielefeld.de/groups/brf/software/gendb_info/license.html</a> |
| Gene Ontology Api For Java                                                                   | <a href="http://combio.cs.brandeis.edu/GeneNotes/index.htm">http://combio.cs.brandeis.edu/GeneNotes/index.htm</a>                                                             |
| Genetdb Regulatory Networks Platform                                                         | <a href="http://bioinformatics.org/project/?group_id=207">http://bioinformatics.org/project/?group_id=207</a>                                                                 |
| Genquire Genome Browsing And Annotation                                                      | <a href="http://bioinformatics.org/project/?group_id=99">http://bioinformatics.org/project/?group_id=99</a>                                                                   |
| Gentle                                                                                       | <a href="http://gentle.magnusmanske.de/">http://gentle.magnusmanske.de/</a>                                                                                                   |
| G-Language Project                                                                           | <a href="http://www.g-language.org/main.html">http://www.g-language.org/main.html</a>                                                                                         |
| Hdbstat                                                                                      | <a href="http://www.soph.uab.edu/ssg_content.asp?id=1289">http://www.soph.uab.edu/ssg_content.asp?id=1289</a>                                                                 |
| Hospital Scenario Generator                                                                  | <a href="http://sourceforge.net/projects/hsg/">http://sourceforge.net/projects/hsg/</a>                                                                                       |
| Imlib3d                                                                                      | <a href="http://imlib3d.sourceforge.net/">http://imlib3d.sourceforge.net/</a>                                                                                                 |
| Internet Pathology Suite                                                                     | <a href="http://sourceforge.net/projects/ipath/">http://sourceforge.net/projects/ipath/</a>                                                                                   |
| Isys                                                                                         | <a href="http://sourceforge.net/projects/isys2/">http://sourceforge.net/projects/isys2/</a>                                                                                   |
| Jaligner                                                                                     | <a href="http://jaligner.sourceforge.net/">http://jaligner.sourceforge.net/</a>                                                                                               |

|                                        |                                                                                                                                           |
|----------------------------------------|-------------------------------------------------------------------------------------------------------------------------------------------|
| Jatlasview                             | <a href="http://www.biomedcentral.com/1471-2105/6/47/abstract">http://www.biomedcentral.com/1471-2105/6/47/abstract</a>                   |
| Jklinika                               | <a href="http://sourceforge.net/projects/jclinic/">http://sourceforge.net/projects/jclinic/</a>                                           |
| Knowtator                              | <a href="http://bionlp.sourceforge.net/Knowtator/index.shtml">http://bionlp.sourceforge.net/Knowtator/index.shtml</a>                     |
| Librarian Virtual Library Of Pdfs      | <a href="http://bioinformatics.org/project/?group_id=131">http://bioinformatics.org/project/?group_id=131</a>                             |
| Mccore                                 | <a href="http://sourceforge.net/projects/mccore">http://sourceforge.net/projects/mccore</a>                                               |
| Medical Words                          | <a href="http://sourceforge.net/projects/medicalwords/">http://sourceforge.net/projects/medicalwords/</a>                                 |
| MedsIt                                 | <a href="http://sourceforge.net/projects/medslt">http://sourceforge.net/projects/medslt</a>                                               |
| Msatfinder                             | <a href="http://www.bioinf.ceh.ac.uk/msatfinder/">http://www.bioinf.ceh.ac.uk/msatfinder/</a>                                             |
| Mugen                                  | <a href="http://genome.jouy.inra.fr/MuGeN/">http://genome.jouy.inra.fr/MuGeN/</a>                                                         |
| Netepi                                 | <a href="http://sourceforge.net/projects/netepi">http://sourceforge.net/projects/netepi</a>                                               |
| Ondex Suite                            | <a href="http://ondex.sourceforge.net/">http://ondex.sourceforge.net/</a>                                                                 |
| Open Infrastructure For Outcomes       | <a href="http://www.txoutcome.org/">http://www.txoutcome.org/</a>                                                                         |
| Openvista                              | <a href="http://www.pacifichui.org/OpenVista/">http://www.pacifichui.org/OpenVista/</a>                                                   |
| Osirix                                 | <a href="http://sourceforge.net/projects/osirix/">http://sourceforge.net/projects/osirix/</a>                                             |
| Paclims                                | <a href="https://sourceforge.net/projects/paclims/">https://sourceforge.net/projects/paclims/</a>                                         |
| Paracelsus                             | <a href="http://sourceforge.net/projects/paracelsus">http://sourceforge.net/projects/paracelsus</a>                                       |
| Patient Record Anonymization Program   | <a href="http://sourceforge.net/project">http://sourceforge.net/project</a>                                                               |
| Pentaplot                              | <a href="http://sourceforge.net/projects/pentaplot">http://sourceforge.net/projects/pentaplot</a>                                         |
| Phaccs                                 | <a href="http://sourceforge.net/projects/phaccs/">http://sourceforge.net/projects/phaccs/</a>                                             |
| Ping                                   | <a href="http://sourceforge.net/projects/pinghealth/">http://sourceforge.net/projects/pinghealth/</a>                                     |
| Portablecbl                            | <a href="http://sourceforge.net/projects/cbl">http://sourceforge.net/projects/cbl</a>                                                     |
| Prehospital Medical Information System | <a href="http://sourceforge.net/projects/premis/">http://sourceforge.net/projects/premis/</a>                                             |
| Probepicker                            | <a href="http://sourceforge.net/projects/probepicker/">http://sourceforge.net/projects/probepicker/</a>                                   |
| Protms                                 | <a href="http://www.protein-ms.de">http://www.protein-ms.de</a>                                                                           |
| Pydaylight                             | <a href="http://www.dalkescientific.com/PyDaylight/">http://www.dalkescientific.com/PyDaylight/</a>                                       |
| Real Time Medical Consultation System  | <a href="http://sourceforge.net/projects/realmedic">http://sourceforge.net/projects/realmedic</a>                                         |
| Semantic Moby                          | <a href="http://biomoby.open-bio.org/index.php/semantic-moby/">http://biomoby.open-bio.org/index.php/semantic-moby/</a>                   |
| Sequence Manipulation Suite 1          | <a href="http://bioinformatics.org/project/?group_id=339">http://bioinformatics.org/project/?group_id=339</a>                             |
| Sight                                  | <a href="http://jsight.sourceforge.net/index_SF.htm">http://jsight.sourceforge.net/index_SF.htm</a>                                       |
| Simpacs                                | <a href="http://www.medical.toshiba.com/clinical/radiology/simpacs.htm">http://www.medical.toshiba.com/clinical/radiology/simpacs.htm</a> |
| Smith-Waterman On Greentea             | <a href="http://bioinformatics.org/project/?group_id=134">http://bioinformatics.org/project/?group_id=134</a>                             |
| Sqlcare                                | <a href="http://sourceforge.net/projects/sqlcare/">http://sourceforge.net/projects/sqlcare/</a>                                           |
| Tassel                                 | <a href="http://sourceforge.net/projects/tassel/">http://sourceforge.net/projects/tassel/</a>                                             |
| The Pogo Group                         | <a href="http://www.bioinformatics.org/pogo/">http://www.bioinformatics.org/pogo/</a>                                                     |
| Tls Motion Determination               | <a href="http://pymmlib.sourceforge.net/">http://pymmlib.sourceforge.net/</a>                                                             |
| W-Curve Genomic String Visualization   | <a href="http://www.bioinformatics.org/wcurve/">http://www.bioinformatics.org/wcurve/</a>                                                 |
| Xml4mat Xml/Matlab Format Converter    | <a href="http://bioinformatics.org/project/?group_id=172">http://bioinformatics.org/project/?group_id=172</a>                             |

|                                                                                 |                                                                                                                                                                                                               |
|---------------------------------------------------------------------------------|---------------------------------------------------------------------------------------------------------------------------------------------------------------------------------------------------------------|
| 3dspI                                                                           | <a href="http://prisma.insa-lyon.fr/~kfrugier/index.php?page=3dspI">http://prisma.insa-lyon.fr/~kfrugier/index.php?page=3dspI</a>                                                                             |
| A Taxonomic Search Engine: Federating Taxonomic Databases Using Web Services    | <a href="http://www.biomedcentral.com/1471-2105/6/48">http://www.biomedcentral.com/1471-2105/6/48</a>                                                                                                         |
| A Two-Way Interface Between Limited Systems Biology Markup Language And R       | <a href="http://www.biomedcentral.com/1471-2105/5/190">http://www.biomedcentral.com/1471-2105/5/190</a>                                                                                                       |
| Abc                                                                             | <a href="http://mendel.stanford.edu/sidowlab/downloads/ABC_GERP/abcgerp.html">http://mendel.stanford.edu/sidowlab/downloads/ABC_GERP/abcgerp.html</a>                                                         |
| Amc Post Processing Package                                                     | <a href="http://idoimaging.com/cgi-bin/imaging/program.pl?ident=254">http://idoimaging.com/cgi-bin/imaging/program.pl?ident=254</a>                                                                           |
| Amide                                                                           | <a href="http://amide.sourceforge.net/">http://amide.sourceforge.net/</a>                                                                                                                                     |
| An Edit Script For Taxonomic Classifications                                    | <a href="http://darwin.zoology.gla.ac.uk/~rpage/forest/">http://darwin.zoology.gla.ac.uk/~rpage/forest/</a>                                                                                                   |
| An Imaging System For Standardized Quantitative Analysis Of C. Elegans Behavior | <a href="http://www.pubmedcentral.nih.gov/articlerender.fcgi?tool=pubmed&amp;pubmedid=15331023">http://www.pubmedcentral.nih.gov/articlerender.fcgi?tool=pubmed&amp;pubmedid=15331023</a>                     |
| Anovarray                                                                       | <a href="http://www.biomedcentral.com/1471-2105/6/150">http://www.biomedcentral.com/1471-2105/6/150</a>                                                                                                       |
| Arb                                                                             | <a href="http://www.arb-home.de/">http://www.arb-home.de/</a>                                                                                                                                                 |
| Arraycghbase                                                                    | <a href="http://medgen.ugent.be/arrayCGHbase/">http://medgen.ugent.be/arrayCGHbase/</a>                                                                                                                       |
| Arrayd                                                                          | <a href="http://www.igib.res.in/scientists/arrayd/arrayd.html">http://www.igib.res.in/scientists/arrayd/arrayd.html</a>                                                                                       |
| Assessing Local Structural Perturbations In Proteins                            | <a href="http://www.biomedcentral.com/1471-2105/6/226">http://www.biomedcentral.com/1471-2105/6/226</a>                                                                                                       |
| Autofact                                                                        | <a href="http://megasun.bch.umontreal.ca/Software/AutoFACT.htm">http://megasun.bch.umontreal.ca/Software/AutoFACT.htm</a>                                                                                     |
| Autoprime                                                                       | <a href="http://www.autoprime.de/">http://www.autoprime.de/</a>                                                                                                                                               |
| Biofloweb                                                                       | <a href="http://urgi.infobiogen.fr/BioFloWeb">http://urgi.infobiogen.fr/BioFloWeb</a>                                                                                                                         |
| Biomap                                                                          | <a href="http://proteinontology.info/">http://proteinontology.info/</a>                                                                                                                                       |
| Bionets                                                                         | <a href="http://x.amath.unc.edu:16080/BioNetS">http://x.amath.unc.edu:16080/BioNetS</a>                                                                                                                       |
| Biotext                                                                         | <a href="http://biotext.berkeley.edu/">http://biotext.berkeley.edu/</a>                                                                                                                                       |
| Blast Score Ration Analysis                                                     | <a href="http://www.microbialgenomics.org/BSR/">http://www.microbialgenomics.org/BSR/</a>                                                                                                                     |
| Blox                                                                            | <a href="http://gecco.org.chemie.uni-frankfurt.de/h-blox/hblox.html">http://gecco.org.chemie.uni-frankfurt.de/h-blox/hblox.html</a>                                                                           |
| Caadapter                                                                       | <a href="http://ncicb.nci.nih.gov/download/">http://ncicb.nci.nih.gov/download/</a>                                                                                                                           |
| Caryoscope                                                                      | <a href="http://caryoscope.stanford.edu/">http://caryoscope.stanford.edu/</a>                                                                                                                                 |
| Cghpro                                                                          | <a href="http://www.molgen.mpg.de/~abt_rop/molecular_cytogenetics/ArrayCGH/CGHPRO/">http://www.molgen.mpg.de/~abt_rop/molecular_cytogenetics/ArrayCGH/CGHPRO/</a>                                             |
| Cgmim                                                                           | <a href="http://www.biomedcentral.com/1471-2105/6/78/abstract">http://www.biomedcentral.com/1471-2105/6/78/abstract</a>                                                                                       |
| Codaln                                                                          | <a href="http://www.bioinf.uni-leipzig.de/Software/codaln/">http://www.bioinf.uni-leipzig.de/Software/codaln/</a>                                                                                             |
| Dishevelled                                                                     | <a href="http://www.pubmedcentral.nih.gov/articlerender.fcgi?artid=533865">http://www.pubmedcentral.nih.gov/articlerender.fcgi?artid=533865</a>                                                               |
| Efficient Decoding Algorithms For Generalized Hidden Markov Model               | <a href="http://www.pubmedcentral.nih.gov/articlerender.fcgi?tool=pubmed&amp;pubmedid=15667658#N0x865898">http://www.pubmedcentral.nih.gov/articlerender.fcgi?tool=pubmed&amp;pubmedid=15667658#N0x865898</a> |

|                                                                                                                              |                                                                                                                                                                         |
|------------------------------------------------------------------------------------------------------------------------------|-------------------------------------------------------------------------------------------------------------------------------------------------------------------------|
| Gene Finders                                                                                                                 | 0.0x86eb7b8                                                                                                                                                             |
| Emboss-Gui                                                                                                                   | <a href="http://bioinfo.pbi.nrc.ca/~lukem/EMBOSS/">http://bioinfo.pbi.nrc.ca/~lukem/EMBOSS/</a>                                                                         |
| Emerencia                                                                                                                    | <a href="http://emerencia.math.chalmers.se/">http://emerencia.math.chalmers.se/</a>                                                                                     |
| Estima                                                                                                                       | <a href="http://titan.biotec.uiuc.edu/ESTIMA/">http://titan.biotec.uiuc.edu/ESTIMA/</a>                                                                                 |
| Expander                                                                                                                     | <a href="http://www.cs.tau.ac.il/~rshamir/expander/">http://www.cs.tau.ac.il/~rshamir/expander/</a>                                                                     |
| Fact                                                                                                                         | <a href="http://www.factweb.de/">http://www.factweb.de/</a>                                                                                                             |
| Fieldtrip                                                                                                                    | <a href="http://www2.ru.nl/fcdonders/fieldtrip/download.html">http://www2.ru.nl/fcdonders/fieldtrip/download.html</a>                                                   |
| Forest                                                                                                                       | <a href="http://darwin.zoology.gla.ac.uk/~rpage/forest/">http://darwin.zoology.gla.ac.uk/~rpage/forest/</a>                                                             |
| Galaxieest                                                                                                                   | <a href="http://www.pdbj.org/GASH/">http://www.pdbj.org/GASH/</a>                                                                                                       |
| Gash                                                                                                                         | <a href="http://bioinformatics.rcsi.ie/~redwards/gasp/">http://bioinformatics.rcsi.ie/~redwards/gasp/</a>                                                               |
| Gasp                                                                                                                         | <a href="http://gata.sourceforge.net/">http://gata.sourceforge.net/</a>                                                                                                 |
| Gendb                                                                                                                        | <a href="http://bioinformatics.org/project/?group_id=474">http://bioinformatics.org/project/?group_id=474</a>                                                           |
| Genenotes                                                                                                                    | <a href="http://combio.cs.brandeis.edu/GeneNotes/index.htm">http://combio.cs.brandeis.edu/GeneNotes/index.htm</a>                                                       |
| Geneorder Coregenes                                                                                                          | <a href="http://binf.gmu.edu/genometools.html">http://binf.gmu.edu/genometools.html</a>                                                                                 |
| Generalizations Of Markov Model To Characterize Biological Sequences                                                         | <a href="http://www.biomedcentral.com/1471-2105/6/219">http://www.biomedcentral.com/1471-2105/6/219</a>                                                                 |
| Generating Quantitative Models Describing The Sequence Specificity Of Biological Processes With The Stabilized Matrix Method | <a href="http://www.mhc-pathway.net/smm">http://www.mhc-pathway.net/smm</a>                                                                                             |
| Genexplorer                                                                                                                  | <a href="http://www.biomedcentral.com/1471-2105/5/141">http://www.biomedcentral.com/1471-2105/5/141</a>                                                                 |
| Genezilla                                                                                                                    | <a href="http://bioinformatics.org/project/?group_id=470">http://bioinformatics.org/project/?group_id=470</a>                                                           |
| Genomeviz                                                                                                                    | <a href="http://www.biomedcentral.com/1471-2105/5/198">http://www.biomedcentral.com/1471-2105/5/198</a>                                                                 |
| Genome-Wide Prediction Display And Refinement Of Binding Sites With Information Theory-Based Models                          | <a href="http://www.biomedcentral.com/1471-2105/4/38">http://www.biomedcentral.com/1471-2105/4/38</a>                                                                   |
| Genomic Multiple Sequence Alignments: Refinement Using A Genetic Algorithm                                                   | <a href="http://www.biomedcentral.com/1471-2105/6/200">http://www.biomedcentral.com/1471-2105/6/200</a>                                                                 |
| Go-Perl Amigo                                                                                                                | <a href="http://search.cpan.org/~cmungall/go-perl/">http://search.cpan.org/~cmungall/go-perl/</a>                                                                       |
| Graphical Oncology Diagnostic System                                                                                         | <a href="http://www.cs.umb.edu/gods/">http://www.cs.umb.edu/gods/</a>                                                                                                   |
| Gridstuffer                                                                                                                  | <a href="http://cmgm.stanford.edu/~cparnot/xgrid-stanford/index.html">http://cmgm.stanford.edu/~cparnot/xgrid-stanford/index.html</a>                                   |
| Grock                                                                                                                        | <a href="http://egee-na4.ct.infn.it/biomed/GROCK.html">http://egee-na4.ct.infn.it/biomed/GROCK.html</a>                                                                 |
| High Througput Snp Detection Pipeline                                                                                        | <a href="http://research.imb.uq.edu.au/seqdoc/">http://research.imb.uq.edu.au/seqdoc/</a>                                                                               |
| High-Throughput Gominer                                                                                                      | <a href="http://discover.nci.nih.gov/gominer/htgm.jsp">http://discover.nci.nih.gov/gominer/htgm.jsp</a>                                                                 |
| Html4blast                                                                                                                   | <a href="http://bioperl.org/wiki/Module:Bio::Tools::Run::Pis eApplication::html4blast">http://bioperl.org/wiki/Module:Bio::Tools::Run::Pis eApplication::html4blast</a> |
| Htsnper1.0                                                                                                                   | <a href="http://bmc.ub.uni-potsdam.de/1471-2105-6-38/">http://bmc.ub.uni-potsdam.de/1471-2105-6-38/</a>                                                                 |
| Identitag                                                                                                                    | <a href="http://pbil.univ-lyon1.fr/software/identitag/">http://pbil.univ-lyon1.fr/software/identitag/</a>                                                               |

|                                                                                                      |                                                                                                                                                                         |
|------------------------------------------------------------------------------------------------------|-------------------------------------------------------------------------------------------------------------------------------------------------------------------------|
| Integrated Web Service For Improving Alignment Quality Based On Segments Comparison                  | <a href="http://www.biomedcentral.com/1471-2105/5/98">http://www.biomedcentral.com/1471-2105/5/98</a>                                                                   |
| Ipath                                                                                                | <a href="http://ipath.ch/team/brauchli">http://ipath.ch/team/brauchli</a>                                                                                               |
| Kclms                                                                                                | <a href="http://puggy.symonds.net/~hareesh/kidwai/">http://puggy.symonds.net/~hareesh/kidwai/</a>                                                                       |
| Ldmas                                                                                                | <a href="http://molpath.his.path.cam.ac.uk/bioinformatics/LDMAS.shtml">http://molpath.his.path.cam.ac.uk/bioinformatics/LDMAS.shtml</a>                                 |
| Libcov                                                                                               | <a href="http://users.cs.dal.ca/~cblouin/libcov/">http://users.cs.dal.ca/~cblouin/libcov/</a>                                                                           |
| Mars                                                                                                 | <a href="http://www.biomedcentral.com/1471-2105/6/101">http://www.biomedcentral.com/1471-2105/6/101</a>                                                                 |
| Maxd                                                                                                 | <a href="http://bioinf.man.ac.uk/microarray/maxd/">http://bioinf.man.ac.uk/microarray/maxd/</a>                                                                         |
| Mbetoolbox                                                                                           | <a href="http://www.biomedcentral.com/1471-2105/6/64#IDA0LZDJ">http://www.biomedcentral.com/1471-2105/6/64#IDA0LZDJ</a>                                                 |
| Mcgh                                                                                                 | <a href="http://folk.uio.no/junbaiw/mcgh/">http://folk.uio.no/junbaiw/mcgh/</a>                                                                                         |
| Mevislab                                                                                             | <a href="http://www.mevislab.de/">http://www.mevislab.de/</a>                                                                                                           |
| Modbiosql                                                                                            | <a href="http://mbiosql.biomembrane.hu/mbs_docs.htm">http://mbiosql.biomembrane.hu/mbs_docs.htm</a>                                                                     |
| Moltalk                                                                                              | <a href="http://www.moltalk.org/">http://www.moltalk.org/</a>                                                                                                           |
| Mouseatlas Software                                                                                  | <a href="http://www.loni.ucla.edu/MAP/">http://www.loni.ucla.edu/MAP/</a>                                                                                               |
| Mprime                                                                                               | <a href="http://kbrin.a-bldg.louisville.edu/Tools/MPrime/">http://kbrin.a-bldg.louisville.edu/Tools/MPrime/</a>                                                         |
| Multiclass Discoverer                                                                                | <a href="http://www.thep.lu.se/~markus/software/classdiscoverer/">http://www.thep.lu.se/~markus/software/classdiscoverer/</a>                                           |
| Muscle                                                                                               | <a href="http://www.drive5.com/muscle">http://www.drive5.com/muscle</a>                                                                                                 |
| Opensputnik                                                                                          | <a href="http://www.opensputnik.org">http://www.opensputnik.org</a>                                                                                                     |
| Paircomp Familyrelationsii And Cartwheel                                                             | <a href="http://family.caltech.edu/">http://family.caltech.edu/</a>                                                                                                     |
| Partigene                                                                                            | <a href="http://www.nematodes.org/PartiGene/">http://www.nematodes.org/PartiGene/</a>                                                                                   |
| Pegasys                                                                                              | <a href="http://bioinformatics.ubc.ca/pegasys/">http://bioinformatics.ubc.ca/pegasys/</a>                                                                               |
| Permol                                                                                               | <a href="http://www.biologie.uni-regensburg.de/Biophysik/Kalbitzer/permol/permol.html">http://www.biologie.uni-regensburg.de/Biophysik/Kalbitzer/permol/permol.html</a> |
| Phenotype And Disease Ontologies                                                                     | <a href="http://diseaseontology.sourceforge.net">http://diseaseontology.sourceforge.net</a>                                                                             |
| Phylogenetic Reconstruction Of Ancestral Character States For Gene Expression And Mrna Splicing Data | <a href="http://rossnes.org/phyrex/">http://rossnes.org/phyrex/</a>                                                                                                     |
| Predicting Functional Sites With An Automated Algorithm Suitable For Heterogeneous Datasets          | <a href="http://www.pmap.csupomona.edu/MINER/dl.html">http://www.pmap.csupomona.edu/MINER/dl.html</a>                                                                   |
| Primermatch                                                                                          | <a href="http://bioinformatics.org/project/?group_id=415">http://bioinformatics.org/project/?group_id=415</a>                                                           |
| Progenexpress                                                                                        | <a href="http://progenexpress.sourceforge.net/">http://progenexpress.sourceforge.net/</a>                                                                               |
| Promi                                                                                                | <a href="http://promi.mpimp-golm.mpg.de/home.shtml">http://promi.mpimp-golm.mpg.de/home.shtml</a>                                                                       |
| Prot4est                                                                                             | <a href="http://bioinformatics.org/cgi-bin/cvsweb.cgi/PartiGene/prot4EST/">http://bioinformatics.org/cgi-bin/cvsweb.cgi/PartiGene/prot4EST/</a>                         |
| Psi-Blast-Iss                                                                                        | <a href="http://www.ibt.lt/bioinformatics/iss/">http://www.ibt.lt/bioinformatics/iss/</a>                                                                               |
| Pyevolve                                                                                             | <a href="http://cbis.anu.edu.au/software.html#PyEvolve">http://cbis.anu.edu.au/software.html#PyEvolve</a>                                                               |
| Scompy                                                                                               | part of biopython                                                                                                                                                       |
| Seqdoc                                                                                               | <a href="http://research.imb.uq.edu.au/seqdoc/">http://research.imb.uq.edu.au/seqdoc/</a>                                                                               |

|                                                                                                                          |                                                                                                                                                                                                                                                                   |
|--------------------------------------------------------------------------------------------------------------------------|-------------------------------------------------------------------------------------------------------------------------------------------------------------------------------------------------------------------------------------------------------------------|
| Seqx                                                                                                                     | <a href="http://janbiro.com/Downloads.html">http://janbiro.com/Downloads.html</a>                                                                                                                                                                                 |
| Simprot                                                                                                                  | <a href="http://www.uhnres.utoronto.ca/labs/tillier/software.htm#3">http://www.uhnres.utoronto.ca/labs/tillier/software.htm#3</a>                                                                                                                                 |
| Spcr                                                                                                                     | <a href="http://moleco.sjtu.edu.cn/SPCR">http://moleco.sjtu.edu.cn/SPCR</a>                                                                                                                                                                                       |
| Squid – A Simple Bioinformatics Grid                                                                                     | <a href="http://www.biomedcentral.com/1471-2105/6/197#B13">http://www.biomedcentral.com/1471-2105/6/197#B13</a>                                                                                                                                                   |
| Ss-Wrapper                                                                                                               | <a href="ftp://ftp.genome.uab.edu">ftp://ftp.genome.uab.edu</a>                                                                                                                                                                                                   |
| Stam                                                                                                                     | The R Project for Statistical Computing                                                                                                                                                                                                                           |
| Stanford Microarray Database                                                                                             | <a href="http://genome-www5.stanford.edu/">http://genome-www5.stanford.edu/</a>                                                                                                                                                                                   |
| Sting Millennium Suite                                                                                                   | <a href="http://mirrors.rcsb.org/SMS/index_m_mirror.html">http://mirrors.rcsb.org/SMS/index_m_mirror.html</a>                                                                                                                                                     |
| Storing Linking And Mining Microarray Databases Using Srs                                                                | <a href="http://www.erasmusmc.nl/gatcplatform">http://www.erasmusmc.nl/gatcplatform</a>                                                                                                                                                                           |
| Superficial                                                                                                              | <a href="http://bioinformatics.charite.de/superficial/">http://bioinformatics.charite.de/superficial/</a>                                                                                                                                                         |
| T.I.M.S                                                                                                                  | <a href="http://bioinformatics.org/macrosHack/prog_list.html">http://bioinformatics.org/macrosHack/prog_list.html</a>                                                                                                                                             |
| Taverna                                                                                                                  | <a href="http://www.mygrid.org.uk/index.php?module=page-master&amp;PAGE_user_op=view_page&amp;PAGE_id=44&amp;MMN_position=53:51:52">http://www.mygrid.org.uk/index.php?module=page-master&amp;PAGE_user_op=view_page&amp;PAGE_id=44&amp;MMN_position=53:51:52</a> |
| Tetra                                                                                                                    | <a href="http://www.megx.net/tetra">http://www.megx.net/tetra</a>                                                                                                                                                                                                 |
| Text2knowledge Text Mining Tools                                                                                         | <a href="http://bioinformatics.org/textknowledge/">http://bioinformatics.org/textknowledge/</a>                                                                                                                                                                   |
| The Cartwheel Bioinformatics Project                                                                                     | <a href="http://cartwheel.caltech.edu/">http://cartwheel.caltech.edu/</a>                                                                                                                                                                                         |
| The Indeval                                                                                                              | <a href="http://www.sci.muni.cz/botany/elzdroje/indeval/">http://www.sci.muni.cz/botany/elzdroje/indeval/</a>                                                                                                                                                     |
| Tmb-Hunt                                                                                                                 | <a href="http://www.biomedcentral.com/1471-2105/6/56">http://www.biomedcentral.com/1471-2105/6/56</a>                                                                                                                                                             |
| Tools Enabling The Elucidation Of Molecular Pathways Active In Human Disease: Application To Hepatitis C Virus Infection | <a href="http://labs.systemsbiology.net/galitski/hepc/if_and_ct.html">http://labs.systemsbiology.net/galitski/hepc/if_and_ct.html</a>                                                                                                                             |
| Tools For Loading Medline Into A Local Relational Database                                                               | <a href="http://biotext.berkeley.edu/software">http://biotext.berkeley.edu/software</a>                                                                                                                                                                           |
| Toophpix                                                                                                                 | <a href="http://truth.positive-internet.com/~mpreston/tp/tp0412intro.html">http://truth.positive-internet.com/~mpreston/tp/tp0412intro.html</a>                                                                                                                   |
| Transalign                                                                                                               | <a href="http://www.tierzucht.tum.de/Bininda-Emonds/">http://www.tierzucht.tum.de/Bininda-Emonds/</a>                                                                                                                                                             |
| Trans-Proteomic Pipeline                                                                                                 | <a href="http://tools.proteomecenter.org/TPP.php">http://tools.proteomecenter.org/TPP.php</a>                                                                                                                                                                     |
| Vestige                                                                                                                  | <a href="http://cbis.anu.edu.au/software.html">http://cbis.anu.edu.au/software.html</a>                                                                                                                                                                           |
| Vienna Rna Package                                                                                                       | <a href="http://www.biomedcentral.com/1471-2105/6/89#IDAF2KLM">http://www.biomedcentral.com/1471-2105/6/89#IDAF2KLM</a>                                                                                                                                           |
| Viral Bioinformatics Resource Center                                                                                     | <a href="http://athena.bioc.uvic.ca/">http://athena.bioc.uvic.ca/</a>                                                                                                                                                                                             |
| Visualization And Analysis Of Microarray And Gene Ontology Data With Treemaps                                            | <a href="http://www.cs.umd.edu/hcil/treemap/">http://www.cs.umd.edu/hcil/treemap/</a>                                                                                                                                                                             |
| Visualization Of Comparative Genomic Analyses By Blast Score Ratio                                                       | <a href="http://www.microbialgenomics.org/BSR/">http://www.microbialgenomics.org/BSR/</a>                                                                                                                                                                         |
| Visualization-Based Discovery And                                                                                        | <a href="http://function.princeton.edu/ChARMView/charm_">http://function.princeton.edu/ChARMView/charm_</a>                                                                                                                                                       |
