# Supplementary material for: A Survey of Quality Assurance Practices in Biomedical Open Source Software Projects
Source: J Med Internet Res. 2007 May 7;9(2):e8. doi: 10.2196/jmir.9.2.e8 (PMC1874720; doi:10.2196/jmir.9.2.e8)
Supplement: Supplementary file 1 [file jmir_v9i2e8_app1.pdf]

## **Multimedia Appendix 1. Survey Form\***

### Demographics and Background

1. How many years of programming experience do you have?
  - ☐ <1 year
  - ☐ 1-5 years
  - ☐ 5+ years
2. How many years have you been involved in developing bioinformatics/biomedical software?
  - ☐ <1 year
  - ☐ 1-5 years
  - ☐ 5+ years
3. Highest academic degree and area: (e.g., M.S in Computer Science)  
\_\_\_\_\_

### Product Characteristics

4. Please specify the name of this open source product:  
\_\_\_\_\_
5. What level of participation do you have in developing this product ?
  - ☐ Dedicated full-time
  - ☐ Part-time, supported by employer
  - ☐ Part-time, personal time
6. What is the estimated current number of users of this product?
  - ☐ 1-5
  - ☐ 5-10
  - ☐ 10-50
  - ☐ 50+
7. How often are the product releases (on an average)?
  - ☐ Every week
  - ☐ Every month
  - ☐ Every quarter
  - ☐ Every six months
  - ☐ Every year
  - ☐ Only one release at this time
8. How long has this product been available to users (i.e., since the first stable release)?  
\_\_\_\_\_

\* Some survey questions were not analyzed in this paper, and hence the relevant questionnaire sections have been excluded.

- ☐ < 6 months
- ☐ 6 months - 1 year
- ☐ 1 - 3 years
- ☐ > 3 years

9. What is the approximate size of this product?

- ☐ < 5,000 LOC
- ☐ 5,000 – 20,000 LOC
- ☐ 20,000 - 50,000 LOC
- ☐ >50,000 LOC

### Peer Reviews

10. Is peer-review an integral part of your software development process?

- ☐ Yes
- ☐ No

11. When are peer review performed?

- ☐ Never
- ☐ Before any source code is committed to the code base (continuously)
- ☐ Before product release
- ☐ Randomly
- ☐ Other: \_\_\_\_\_

12. In general, how often is code peer reviewed before it is committed to the code base?

- ☐ Almost always
- ☐ Frequently
- ☐ Half the time
- ☐ Occasionally
- ☐ Never

13. In general, how often is code peer reviewed before product release?

- ☐ Almost always
- ☐ Frequently
- ☐ Half the time
- ☐ Occasionally
- ☐ Never

14. How frequently do you peer review other people's code in this project?

- ☐ Almost always
- ☐ Frequently
- ☐ Half the time
- ☐ Occasionally

☐ Never

15. How often do you ask that others peer review your code?

- ☐ Almost always
- ☐ Frequently
- ☐ Half the time
- ☐ Occasionally
- ☐ Never

16. If code is not peer reviewed, what is the reason?

- ☐ It is considered unnecessary as the code is usually of high quality
- ☐ Work is too busy to review code
- ☐ Reviewing code brings no benefit
- ☐ Unsure how to review to best effect
- ☐ Other: \_\_\_\_\_

17. How much experience do you have of peer-reviewing other people's code ?

- ☐ <1 year
- ☐ 1-5 years
- ☐ 5+ years
- ☐ None

18. Do you use a checklist for peer review?

- ☐ Yes
- ☐ No

19. On average, how many people typically peer review your code snippets?

- ☐ 1
- ☐ 2 - 3
- ☐ 5-10
- ☐ 10+
- ☐ None

### Testing

20. Have you received any formal education/training in software testing?

- ☐ Yes (Please specify)
- ☐ No

21. Is testing an integral part of your open source development process?

- ☐ Yes
- ☐ No

22. Testing is performed:

- ☐ Continuously (e.g. before any source code is committed to the code base)
- ☐ Before product release (alpha testing)

- ☐ After product is released to specific users
- ☐ Randomly
- ☐ Other: \_\_\_\_\_

23. Do you perform?

- ☐ Unit testing (testing whether individual modules function as expected)
- ☐ Integration testing (testing whether a group of modules function as expected)
- ☐ System testing (testing high-level usage scenarios)
- ☐ System load and performance testing
- ☐ Other: \_\_\_\_\_

24. How often do you unit test the software that you write?

- ☐ Almost always
- ☐ Frequently
- ☐ Half the time
- ☐ Occasionally
- ☐ Never

25. What strategy do you adopt in choosing your test cases?

- ☐ Provide inputs trying to imitate valid user behavior
- ☐ Choose those inputs most likely to cause failure
- ☐ Choose inputs according to your experience
- ☐ Use script to provide random values as inputs
- ☐ Provide extreme values as inputs
- ☐ Provide boundary conditions as inputs
- ☐ Try extreme loads on the system (e.g., many users and large volumes of data)
- ☐ Other

26. What percentage of your time is spent on testing

- ☐ <20%
- ☐ 20% - 40%
- ☐ 40% - 60%
- ☐ 60% - 80%
- ☐ >80%

27. Do you contribute your test cases to a regression test suite?

- ☐ Yes
- ☐ No

28. Do you have a “baseline” test suite that you re-run in your software before every release?

- ☐ Yes
- ☐ No

29. What percentage of the source code is covered by the testing activity?

- ☐ <20%
- ☐ 20% - 40%
- ☐ 40% - 60%
- ☐ 60% - 80%
- ☐ >80%
- ☐ Don't know

30. The coverage information in the previous question was based on:

- ☐ Personal estimation
- ☐ Reports by coverage tool (please specify name: \_\_\_\_\_)

31. What percentage of the defects that you fix are discovered during your testing?

- ☐ <20%
- ☐ 20% - 40%
- ☐ 40% - 60%
- ☐ 60% - 80%
- ☐ >80%

32. What percentage of the defects that you fix are discovered by users?

- ☐ <20%
- ☐ 20% - 40%
- ☐ 40% - 60%
- ☐ 60% - 80%
- ☐ >80%

33. Do you use testing tools during your development?

- ☐ Yes (Please give name: \_\_\_\_\_)
- ☐ No

### Suggestions, Comments, and Feedback

Please do let us know about your suggestions and comments about this survey.

---

---

Would you consent to be contacted later via e-mail if we need some additional information about your response?

- ☐ Yes
- ☐ No
- ☐ No answer
